# Supplementary material for: Improved Minimum Cost and Maximum Power Two Stage Genome-Wide Association Study Designs
Source: PubMed Central journal article supplement (PMC3435377; doi:10.1371/journal.pone.0042367), 2012-09-06
Supplement: pone.0042367.s001.pdf [file pone.0042367.s001.pdf]

## **Improved minimum cost and maximum power two-stage genome-wide association study designs: Supplementary calculation details**

Stephen A. Stanhope<sup>1</sup>, Andrew D. Skol<sup>2</sup>

**1 Dept. of Human Genetics, The University of Chicago, Chicago, IL, USA**

**2 Program in Genetic Medicine, The University of Chicago, Chicago, IL, USA**

**\* E-mail: [sstanhop@bsd.uchicago.edu](mailto:sstanhop@bsd.uchicago.edu)**

## Proof of Theorem 1

Without loss of generality we ignore  $\pi_1$  and  $\pi_0$  terms, and we assume that as  $N_1 \rightarrow \infty$  the ratio of controls to cases remains  $R_{cc} = N_0/N_1$ . By the central limit theorem and assumed homogeneity of stage 1 and 2 samples,

$$\sqrt{N_1}(\hat{p}_{1,1} - p_1) \xrightarrow{L} N(0, p_1(1 - p_1)/2),$$

$$\sqrt{N_1}(\hat{p}_{0,1} - p_0) \xrightarrow{L} N(0, p_0(1 - p_0)/(2R_{cc}))$$

and the covariance between the two estimators is zero since they are based on independent samples. Next, we decompose  $z_1$  into two parts:

$$\begin{aligned} z_1 &= \frac{\hat{p}_{1,1} - \hat{p}_{0,1}}{\sqrt{(\hat{p}_{1,1}(1 - \hat{p}_{1,1})/(2N_1) + (\hat{p}_{0,1}(1 - \hat{p}_{0,1}))/ (2R_{cc}N_1))}} \\ &= N_1^{1/2} \frac{\hat{p}_{1,1} - \hat{p}_{0,1}}{\sqrt{(\hat{p}_{1,1}(1 - \hat{p}_{1,1})/2) + (\hat{p}_{0,1}(1 - \hat{p}_{0,1}))/ (2R_{cc})}} \\ &= N_1^{1/2} g(\hat{p}_{1,1}, \hat{p}_{0,1}) \end{aligned}$$

where  $g(t_1, t_2)$  is now independent of  $N_1$ . The first partial derivatives of  $g$  are:

$$\frac{\partial g}{\partial t_1}(p_1, p_0) = \sqrt{\frac{1}{d}} - (p_1 - p_0) \frac{2^{-1}(1 - 2p_1)}{2d^{3/2}},$$

$$\frac{\partial g}{\partial t_0}(p_1, p_0) = -\sqrt{\frac{1}{d}} - (p_1 - p_0) \frac{(2R_{cc})^{-1}(1 - 2p_0)}{2d^{3/2}}$$

where  $d = 2^{-1}p_1(1 - p_1) + (2R_{cc})^{-1}p_0(1 - p_0)$ . We note that the first partial derivatives of  $g$  exist and are nonzero everywhere in  $(0, 1)^2$ , so the conditions for using the delta method are met (e.g. Lehmann 1999, Chapter 5.2, Theorem 5.2.3). Therefore

$$\sqrt{N_1}(g(\hat{p}_{1,1}, \hat{p}_{0,1}) - g(p_1, p_0)) \xrightarrow{L} N(0, \tau)$$

where

$$\tau = \frac{p_1(1-p_1)}{2} \left( \frac{\partial g}{\partial t_1}(p_1, p_0) \right)^2 + \frac{p_0(1-p_0)}{2R_{cc}} \left( \frac{\partial g}{\partial t_0}(p_1, p_0) \right)^2.$$

We note that the equation given for  $\sigma_1^2$  given in Theorem 1 includes the effects of the stage 1 sample allocations, and has been simplified into a more intuitive formula than that presented here.

## Fisher information weight calculation

The information of a stage-specific test statistic is equal to the inverse of its variance, and the squared weight given to  $z_1$  is therefore:

$$w_1^2 = \frac{Var[Z_1]^{-1}}{Var[Z_1]^{-1} + Var[Z_0]^{-1}}$$

where

$$Var[Z_1] = \left( (2\pi_0 N_0)^{-1} + (2\pi_1 N_1)^{-1} \right) p_1 (1 - p_1),$$

$$Var[Z_0] = \left( (2(1 - \pi_0) N_0)^{-1} + (2(1 - \pi_1) N_1)^{-1} \right) p_0 (1 - p_0).$$

The form for  $w_1$  given in the text is by the transformation  $a^{-1} (a^{-1} + b^{-1})^{-1} = (ab^{-1} + 1)^{-1}$ , and is under the null of no difference between cases and controls.

## Stage 2 critical value calculation details

We compute  $p(v ; v_1) = Pr^0(|Z| > v \mid |Z_1| > v_1)$  by integrating over the conditional distribution of  $Z_1$  and decomposing  $Z$  into its stage-specific portions:

$$p(v ; v_1) = \int_{-\infty}^{-v_1} Pr^0(|Z| > v \mid Z_1 = z) Pr^0(Z_1 = z \mid |Z_1| > v_1) dz + \int_{v_1}^{\infty} Pr^0(|Z| > v \mid Z_1 = z) Pr^0(Z_1 = z \mid |Z_1| > v_1) dz$$

where

$$\begin{aligned} Pr^0(|Z| > v \mid Z_1 = z) &= Pr^0(Z > v \mid Z_1 = z) + Pr^0(Z < -v \mid Z_1 = z) \\ &= Pr^0(w_1 Z_1 + w_2 Z_2 > v \mid Z_1 = z) + Pr^0(w_1 Z_1 + w_2 Z_2 < -v \mid Z_1 = z) \\ &= Pr^0(Z_2 > (v - w_1 z)/w_2) + Pr^0(Z_2 < (-v - w_1 z)/w_2). \end{aligned}$$

Under  $H_0$ ,  $Z_1$  and  $Z_2$  are asymptotically  $N(0, 1)$  distributed, and so

$$p(v ; v_1) \approx \int_{-\infty}^{-v_1} \left( \Phi\left(\frac{-v - w_1 z_1}{w_2}\right) + 1 - \Phi\left(\frac{v - w_1 z_1}{w_2}\right) \right) g(z_1 ; v_1) dz_1 + \int_{v_1}^{\infty} \left( \Phi\left(\frac{-v - w_1 z_1}{w_2}\right) + 1 - \Phi\left(\frac{v - w_1 z_1}{w_2}\right) \right) g(z_1 ; v_1) dz_1 \quad (1)$$

where

$$g(z_1 ; v_1) = \frac{\phi(z_1)}{\Phi(-v_1) + 1 - \Phi(v_1)}.$$

## Stage 2 power calculation details

To obtain the power of the joint test conditional on  $|Z_1| > v_1$  we use a computation analogous to that used to compute type I error:

$$P_2(\pi) = \int_{-\infty}^{-v_1} h(z ; w_1, w_2, v, \mu_2, \sigma_2^2) g(z ; v_1, \mu_1, \sigma_1^2) dz + \int_{v_1}^{\infty} h(z ; w_1, w_2, v, \mu_2, \sigma_2^2) g(z ; v_1, \mu_1, \sigma_1^2) dz \quad (2)$$

where:

$$h(z ; w_1, w_2, v, \mu_2, \sigma_2^2) = \Phi\left(\frac{-(v + w_1 z)/w_2 - \mu_2}{\sigma_2}\right) + 1 - \Phi\left(\frac{(v - w_1 z)/w_2 - \mu_2}{\sigma_2}\right),$$

and we define  $g(z ; v_1, \mu_1, \sigma_1^2)$  analogously to what we previously defined in describing the stage 2 critical value.
