# Supplementary material for: Improved Minimum Cost and Maximum Power Two Stage Genome-Wide Association Study Designs
Source: PubMed Central journal article supplement (PMC3435377; doi:10.1371/journal.pone.0042367), 2012-09-06
Supplement: pone.0042367.s003.pdf [file pone.0042367.s003.pdf]

| $\kappa$ (%) | $p$ (%) | $R_{cc}$ | $c_2$      | $p_1, p_0$ (%) |
|--------------|---------|----------|------------|----------------|
| 10           | 50      | 1        | 1, 10, 100 | 61.7, 48.7     |
| 10           | 50      | 2        | 1, 10, 100 | 60.1, 48.9     |
| 10           | 50      | 4        | 1, 10, 100 | 59.2, 49.0     |
| 10           | 50      | 8        | 1, 10, 100 | 58.7, 49.0     |
| 10           | 25      | 1        | 1, 10, 100 | 35.7, 23.8     |
| 10           | 25      | 2        | 1, 10, 100 | 34.4, 24.0     |
| 10           | 25      | 4        | 1, 10, 100 | 33.6, 24.0     |
| 10           | 25      | 8        | 1, 10, 100 | 33.2, 24.1     |
| 10           | 10      | 1        | 1, 10, 100 | 18.0, 9.1      |
| 10           | 10      | 2        | 1, 10, 100 | 17.1, 9.2      |
| 10           | 10      | 4        | 1, 10, 100 | 16.6, 9.3      |
| 10           | 10      | 8        | 1, 10, 100 | 16.3, 9.3      |
| 1            | 50      | 1        | 1, 10, 100 | 62.8, 49.9     |
| 1            | 50      | 2        | 1, 10, 100 | 61.1, 49.9     |
| 1            | 50      | 4        | 1, 10, 100 | 60.2, 49.9     |
| 1            | 50      | 8        | 1, 10, 100 | 59.6, 49.9     |
| 1            | 25      | 1        | 1, 10, 100 | 37.0, 24.9     |
| 1            | 25      | 2        | 1, 10, 100 | 35.4, 24.9     |
| 1            | 25      | 4        | 1, 10, 100 | 34.5, 24.9     |
| 1            | 25      | 8        | 1, 10, 100 | 34.1, 24.9     |
| 1            | 10      | 1        | 1, 10, 100 | 19.1, 9.9      |
| 1            | 10      | 2        | 1, 10, 100 | 18.0, 9.9      |
| 1            | 10      | 4        | 1, 10, 100 | 17.4, 9.9      |
| 1            | 10      | 8        | 1, 10, 100 | 17.1, 9.9      |
