# Supplementary material for: Improved Minimum Cost and Maximum Power Two Stage Genome-Wide Association Study Designs
Source: PubMed Central journal article supplement (PMC3435377; doi:10.1371/journal.pone.0042367), 2012-09-06
Supplement: pone.0042367.s004.pdf [file pone.0042367.s004.pdf]

| Experimental Parameters |          | $p_1 = p_0$ |                 |                  |                           |                        |                      |                           |                      |                        |  |  |
|-------------------------|----------|-------------|-----------------|------------------|---------------------------|------------------------|----------------------|---------------------------|----------------------|------------------------|--|--|
| $p$ (%)                 | $R_{cc}$ | $c_2$       | Constrained     |                  |                           |                        |                      | Unconstrained             |                      |                        |  |  |
|                         |          |             | IS Rel cost (%) | $\pi, \pi_M$ (%) | Stage 1,2, tot. power (%) | Tot. power sensitivity | 1S, 2S Rel. cost (%) | Stage 1,2, tot. power (%) | Sim. total power (%) | Tot. power sensitivity |  |  |
| 50                      | 1        | 1           | 29.66, 9.62     | 29, 30, 8.5      | 93.5, 83.4, 78.0          | 65.38, 87.36           | 35.95, 98.69         | 93.10, 83.79, 78.00       | 78.53                | 65.95, 87.62           |  |  |
| 50                      | 1        | 10          | 44.94, 1.03     | 44, 45, 1.0      | 91.3, 85.4, 78.0          | 69.26, 85.16           | 50.05, 98.89         | 91.00, 85.74, 78.02       | 78.38                | 69.00, 85.22           |  |  |
| 50                      | 1        | 100         | 59.59, 0.15     | 57, 60, 0.1      | 91.1, 85.6, 78.0          | 72.46, 84.30           | 62.65, 95.42         | 88.64, 88.0, 78.06        | 77.79                | 71.47, 82.99           |  |  |
| 50                      | 2        | 1           | 31.80, 9.23     | 31, 34, 9.3      | 94.5, 82.5, 78.0          | 65.10, 87.73           | 38.32, 100.60        | 95.09, 82.04, 78.01       | 78.23                | 65.42, 88.16           |  |  |
| 50                      | 2        | 10          | 46.26, 1.12     | 46, 51, 0.9      | 92.3, 84.5, 78.0          | 68.28, 85.24           | 52.37, 100.18        | 93.03, 83.85, 78.00       | 78.31                | 68.99, 85.75           |  |  |
| 50                      | 2        | 100         | 61.44, 0.05     | 59, 64, 0.1      | 86.4, 90.3, 78.0          | 71.10, 81.40           | 64.60, 101.94        | 90.65, 86.11, 78.05       | 78.11                | 71.47, 83.37           |  |  |
| 50                      | 4        | 1           | 31.79, 9.72     | 32, 38, 9.2      | 94.7, 82.4, 78.0          | 64.33, 86.98           | 39.34, 102.40        | 96.51, 80.82, 78.00       | 78.06                | 65.54, 88.12           |  |  |
| 50                      | 4        | 10          | 48.53, 0.83     | 46, 53, 1.1      | 92.2, 84.6, 78.0          | 68.48, 84.82           | 53.18, 100.72        | 94.74, 82.35, 78.02       | 78.28                | 69.17, 85.83           |  |  |
| 50                      | 4        | 100         | 57.79, 0.15     | 60, 66, 0.1      | 89.6, 87.1, 78.0          | 69.85, 82.46           | 65.08, 101.49        | 91.80, 84.99, 78.02       | 78.13                | 72.16, 83.75           |  |  |
| 50                      | 8        | 1           | 31.37, 10.40    | 27, 39, 8.9      | 94.7, 82.4, 78.0          | 64.75, 87.56           | 34.71, 90.14         | 96.62, 80.73, 78.00       | 78.39                | 66.07, 88.22           |  |  |
| 50                      | 8        | 10          | 46.32, 1.22     | 41, 55, 0.9      | 92.7, 84.1, 78.0          | 68.16, 84.82           | 47.72, 90.27         | 94.74, 82.34, 78.00       | 78.17                | 69.24, 85.85           |  |  |
| 50                      | 8        | 100         | 57.96, 0.24     | 53, 67, 0.1      | 91.9, 84.9, 78.0          | 70.72, 84.30           | 59.10, 86.84         | 92.12, 84.68, 78.00       | 78.45                | 72.13, 83.81           |  |  |
| 25                      | 1        | 1           | 31.00, 9.72     | 31, 31, 9.3      | 94.4, 82.6, 78.0          | 70.11, 84.61           | 37.41, 99.23         | 94.20, 82.81, 78.01       | 78.55                | 70.18, 84.43           |  |  |
| 25                      | 1        | 10          | 47.11, 1.03     | 44, 45, 1.3      | 92.6, 84.2, 78.0          | 72.72, 83.48           | 51.71, 98.39         | 92.25, 84.56, 78.00       | 78.19                | 72.14, 83.13           |  |  |
| 25                      | 1        | 100         | 61.13, 0.05     | 59, 61, 0.1      | 86.3, 90.4, 78.0          | 73.27, 80.11           | 64.00, 101.46        | 89.51, 87.21, 78.06       | 77.83                | 74.05, 81.44           |  |  |
| 25                      | 2        | 1           | 29.87, 9.72     | 28, 32, 9.1      | 94.2, 82.8, 78.0          | 69.15, 84.27           | 35.76, 97.48         | 94.28, 82.73, 78.00       | 78.05                | 69.27, 84.38           |  |  |
| 25                      | 2        | 10          | 45.37, 1.03     | 41, 47, 1.2      | 91.9, 84.9, 78.0          | 71.37, 82.78           | 49.84, 97.73         | 92.55, 84.31, 78.03       | 77.85                | 71.48, 83.03           |  |  |
| 25                      | 2        | 100         | 60.12, 0.05     | 55, 63, 0.1      | 85.5, 91.2, 78.0          | 72.76, 79.39           | 61.90, 99.65         | 90.09, 86.62, 78.04       | 77.89                | 73.51, 81.75           |  |  |
| 25                      | 4        | 1           | 28.36, 8.74     | 22, 34, 7.7      | 92.9, 84.0, 78.0          | 69.17, 84.16           | 30.22, 87.29         | 93.95, 83.04, 78.01       | 77.60                | 69.07, 84.06           |  |  |
| 25                      | 4        | 10          | 42.89, 1.03     | 35, 51, 0.8      | 90.7, 86.0, 78.0          | 71.32, 82.44           | 43.14, 88.45         | 92.41, 84.44, 78.03       | 77.78                | 71.49, 82.64           |  |  |
| 25                      | 4        | 100         | 57.71, 0.05     | 47, 62, 0.1      | 84.3, 92.5, 78.0          | 72.38, 79.23           | 55.00, 91.93         | 89.59, 87.14, 78.07       | 77.70                | 73.57, 81.79           |  |  |
| 25                      | 8        | 1           | 29.65, 9.03     | 21, 36, 8.3      | 94.0, 83.0, 78.0          | 68.34, 84.11           | 29.08, 80.78         | 95.80, 81.42, 78.00       | 77.82                | 68.55, 84.43           |  |  |
| 25                      | 8        | 10          | 44.05, 1.12     | 35, 53, 0.7      | 91.9, 84.9, 78.0          | 70.79, 82.83           | 41.41, 82.29         | 93.60, 83.35, 78.02       | 77.64                | 71.48, 82.86           |  |  |
| 25                      | 8        | 100         | 59.47, 0.05     | 45, 65, 0.1      | 85.6, 91.1, 78.0          | 71.78, 79.23           | 52.50, 85.37         | 91.71, 85.08, 78.03       | 77.37                | 73.14, 81.51           |  |  |
| 10                      | 1        | 1           | 30.47, 10.21    | 29, 29, 9.5      | 94.6, 82.5, 78.0          | 71.74, 84.03           | 35.74, 95.14         | 93.45, 83.47, 78.00       | 78.20                | 71.34, 83.18           |  |  |
| 10                      | 1        | 10          | 46.32, 1.03     | 43, 47, 0.9      | 92.4, 84.4, 78.0          | 73.71, 82.67           | 49.95, 96.33         | 91.17, 85.57, 78.02       | 77.97                | 73.31, 81.87           |  |  |
| 10                      | 1        | 100         | 61.03, 0.05     | 56, 60, 0.1      | 86.4, 90.3, 78.0          | 74.43, 79.88           | 62.20, 98.76         | 88.70, 87.98, 78.03       | 78.30                | 75.12, 80.69           |  |  |
| 10                      | 2        | 1           | 28.86, 9.72     | 22, 29, 9.4      | 94.3, 82.7, 78.0          | 71.15, 83.92           | 31.44, 87.89         | 92.59, 84.27, 78.00       | 77.62                | 70.07, 82.99           |  |  |
| 10                      | 2        | 10          | 45.06, 0.93     | 36, 46, 0.9      | 91.9, 84.9, 78.0          | 73.06, 82.69           | 44.79, 89.28         | 90.52, 86.21, 78.03       | 77.55                | 72.16, 81.60           |  |  |
| 10                      | 2        | 100         | 59.37, 0.15     | 48, 60, 0.1      | 91.9, 84.9, 78.0          | 75.54, 82.86           | 56.80, 86.76         | 88.31, 88.34, 78.01       | 77.61                | 74.03, 80.60           |  |  |
| 10                      | 4        | 1           | 27.92, 9.91     | 21, 33, 7.2      | 92.9, 84.0, 78.0          | 69.79, 83.64           | 28.92, 86.88         | 97.87, 79.71, 78.00       | 77.00                | 69.59, 83.66           |  |  |
| 10                      | 4        | 10          | 43.67, 1.12     | 34, 50, 0.7      | 90.6, 86.1, 78.0          | 71.81, 82.22           | 41.60, 87.54         | 95.81, 81.42, 78.01       | 77.27                | 71.27, 81.93           |  |  |
| 10                      | 4        | 100         | 58.73, 0.05     | 44, 64, 0.1      | 87.4, 89.2, 78.0          | 73.10, 79.01           | 53.20, 89.43         | 93.01, 83.78, 78.01       | 77.23                | 72.83, 80.39           |  |  |
| 10                      | 8        | 1           | 25.78, 9.52     | 16, 35, 6.2      | 92.9, 84.0, 78.0          | 69.11, 82.51           | 23.18, 70.59         | 94.54, 82.51, 78.01       | 76.67                | 69.26, 82.71           |  |  |
| 10                      | 8        | 10          | 39.41, 1.42     | 27, 52, 0.6      | 91.3, 85.4, 78.0          | 71.12, 81.99           | 33.99, 70.79         | 92.96, 83.94, 78.03       | 77.33                | 71.56, 81.19           |  |  |
| 10                      | 8        | 100         | 56.14, 0.15     | 36, 61, 0.1      | 90.0, 85.8, 78.0          | 73.88, 81.66           | 44.90, 71.58         | 90.10, 86.62, 78.04       | 77.13                | 72.95, 80.30           |  |  |
