# Supplementary material for: Improved Minimum Cost and Maximum Power Two Stage Genome-Wide Association Study Designs
Source: PubMed Central journal article supplement (PMC3435377; doi:10.1371/journal.pone.0042367), 2012-09-06
Supplement: pone.0042367.s005.pdf [file pone.0042367.s005.pdf]

| Experimental Parameters |          | $p_1 = p_0$ |                  |                 |                           |                        | Constrained               |                      | Unconstrained             |                      |                        |  |  |
|-------------------------|----------|-------------|------------------|-----------------|---------------------------|------------------------|---------------------------|----------------------|---------------------------|----------------------|------------------------|--|--|
| $p$ (%)                 | $R_{cc}$ | $c_2$       | $\pi, \pi_M$ (%) | 1S Rel cost (%) | Stage 1,2, tot. power (%) | Tot. power sensitivity | $\pi_0, \pi_1, \pi_M$ (%) | 1S, 2S Rel. cost (%) | Stage 1,2, tot. power (%) | Sim. total power (%) | Tot. power sensitivity |  |  |
| 50                      | 1        | 1           | 31.38, 10.21     | 38.39           | 94.8, 82.3, 78.0          | 64.98, 88.03           | 32, 31, 9.9               | 38.28, 99.73         | 94.70, 82.37, 78.00       | 78.32                | 65.27, 88.11           |  |  |
| 50                      | 1        | 10          | 46.21, 1.03      | 52.23           | 92.7, 84.1, 78.0          | 68.64, 85.42           | 46, 46, 1.2               | 52.48, 100.47        | 92.62, 84.21, 78.00       | 78.05                | 68.52, 85.97           |  |  |
| 50                      | 1        | 100         | 58.84, 0.15      | 65.45           | 89.7, 87.0, 78.0          | 71.25, 84.00           | 60, 62, 0.1               | 64.90, 99.16         | 89.96, 86.74, 78.04       | 78.55                | 72.04, 84.00           |  |  |
| 50                      | 2        | 1           | 30.48, 10.11     | 37.50           | 94.2, 82.8, 78.0          | 65.01, 87.54           | 29, 33, 9.3               | 36.81, 98.14         | 94.41, 82.64, 78.02       | 78.34                | 65.40, 88.22           |  |  |
| 50                      | 2        | 10          | 45.06, 1.22      | 51.76           | 92.1, 84.7, 78.0          | 68.22, 85.51           | 44, 50, 0.9               | 50.86, 98.25         | 92.36, 84.48, 78.02       | 78.18                | 68.87, 85.81           |  |  |
| 50                      | 2        | 100         | 60.76, 0.05      | 62.72           | 86.0, 90.7, 78.0          | 70.90, 80.90           | 57, 63, 0.1               | 63.10, 100.60        | 89.96, 86.77, 78.06       | 77.86                | 72.55, 83.89           |  |  |
| 50                      | 4        | 1           | 29.66, 9.33      | 36.22           | 93.3, 83.6, 78.0          | 65.66, 87.83           | 23, 34, 8.1               | 31.25, 86.29         | 93.55, 83.38, 78.01       | 78.30                | 65.49, 87.12           |  |  |
| 50                      | 4        | 10          | 44.09, 1.12      | 50.35           | 91.1, 85.6, 78.0          | 69.01, 85.63           | 36, 50, 0.9               | 44.30, 87.99         | 91.82, 84.97, 78.02       | 78.24                | 69.03, 85.67           |  |  |
| 50                      | 4        | 100         | 59.27, 0.15      | 65.37           | 90.9, 85.8, 78.0          | 72.80, 85.06           | 48, 64, 0.1               | 56.08, 85.77         | 89.89, 86.82, 78.04       | 78.38                | 71.77, 83.85           |  |  |
| 50                      | 8        | 1           | 31.78, 10.01     | 38.60           | 94.7, 82.4, 78.0          | 65.07, 87.94           | 25, 39, 7.9               | 32.35, 83.80         | 96.06, 81.20, 78.00       | 78.20                | 65.49, 88.24           |  |  |
| 50                      | 8        | 10          | 46.97, 1.12      | 52.90           | 92.6, 84.2, 78.0          | 68.68, 85.71           | 38, 54, 0.9               | 45.19, 85.42         | 94.21, 82.82, 78.02       | 78.19                | 69.22, 86.06           |  |  |
| 50                      | 8        | 100         | 58.08, 0.15      | 64.36           | 89.7, 87.0, 78.0          | 70.81, 83.13           | 50, 66, 0.1               | 56.60, 87.93         | 91.53, 85.23, 78.02       | 78.38                | 72.08, 83.84           |  |  |
| 25                      | 1        | 1           | 28.79, 9.62      | 35.64           | 93.0, 83.9, 78.0          | 70.23, 84.79           | 28, 29, 9.3               | 35.14, 98.63         | 95.00, 82.12, 78.01       | 77.97                | 69.79, 84.24           |  |  |
| 25                      | 1        | 10          | 42.85, 1.22      | 49.82           | 90.9, 85.8, 78.0          | 71.83, 82.51           | 43, 44, 1.0               | 49.15, 98.65         | 92.72, 84.15, 78.02       | 77.17                | 71.37, 82.05           |  |  |
| 25                      | 1        | 100         | 58.59, 0.05      | 60.66           | 84.6, 92.2, 78.0          | 72.89, 79.42           | 55, 60, 0.1               | 61.75, 101.79        | 89.96, 86.74, 78.04       | 78.13                | 73.77, 81.27           |  |  |
| 25                      | 2        | 1           | 30.97, 9.03      | 37.20           | 94.4, 82.6, 78.0          | 69.61, 84.41           | 27, 32, 9.3               | 35.30, 94.88         | 94.16, 82.84, 78.00       | 77.89                | 69.39, 84.50           |  |  |
| 25                      | 2        | 10          | 45.39, 1.12      | 51.50           | 92.3, 84.5, 78.0          | 71.87, 83.09           | 41, 47, 1.1               | 49.27, 95.65         | 92.13, 84.69, 78.02       | 77.98                | 71.18, 82.76           |  |  |
| 25                      | 2        | 100         | 60.70, 0.05      | 62.66           | 86.2, 90.5, 78.0          | 73.13, 80.15           | 57, 63, 0.1               | 63.10, 100.69        | 89.96, 86.77, 78.06       | 78.14                | 74.07, 82.13           |  |  |
| 25                      | 4        | 1           | 30.06, 10.11     | 37.13           | 94.7, 82.4, 78.0          | 68.35, 84.31           | 27, 35, 8.9               | 34.95, 94.13         | 95.69, 81.53, 78.01       | 77.71                | 68.83, 84.60           |  |  |
| 25                      | 4        | 10          | 45.38, 1.12      | 51.49           | 92.5, 84.3, 78.0          | 70.66, 82.67           | 41, 50, 1.0               | 48.52, 94.21         | 93.59, 83.35, 78.01       | 77.46                | 70.79, 83.05           |  |  |
| 25                      | 4        | 100         | 60.74, 0.05      | 62.70           | 86.4, 90.3, 78.0          | 72.47, 79.58           | 48, 64, 0.1               | 56.08, 89.43         | 89.89, 86.82, 78.04       | 76.72                | 72.10, 80.75           |  |  |
| 25                      | 8        | 1           | 29.67, 9.42      | 36.29           | 94.2, 82.8, 78.0          | 69.06, 84.96           | 20, 37, 6.4               | 26.88, 74.08         | 94.93, 82.17, 78.00       | 77.83                | 68.86, 84.36           |  |  |
| 25                      | 8        | 10          | 44.97, 1.12      | 51.13           | 92.5, 84.3, 78.0          | 71.43, 83.38           | 31, 52, 0.8               | 38.66, 75.61         | 93.39, 83.55, 78.02       | 77.78                | 71.25, 82.88           |  |  |
| 25                      | 8        | 100         | 59.81, 0.05      | 61.81           | 85.8, 90.9, 78.0          | 73.11, 80.17           | 42, 63, 0.1               | 49.90, 88.16         | 90.52, 86.19, 78.02       | 77.81                | 72.89, 81.24           |  |  |
| 10                      | 1        | 1           | 26.86, 9.81      | 34.03           | 93.5, 83.4, 78.0          | 71.17, 83.02           | 27, 27, 9.9               | 34.22, 100.56        | 92.34, 84.47, 78.00       | 78.30                | 71.61, 83.23           |  |  |
| 10                      | 1        | 10          | 43.73, 1.12      | 50.03           | 91.3, 85.4, 78.0          | 73.96, 82.73           | 42, 44, 0.9               | 48.13, 96.19         | 89.89, 86.78, 78.00       | 78.05                | 72.90, 81.68           |  |  |
| 10                      | 1        | 100         | 59.02, 0.05      | 61.06           | 85.0, 91.8, 78.0          | 74.46, 79.53           | 53, 60, 0.1               | 60.85, 99.64         | 87.93, 88.78, 78.06       | 78.23                | 74.91, 80.87           |  |  |
| 10                      | 2        | 1           | 27.92, 9.91      | 35.06           | 93.8, 83.2, 78.0          | 71.20, 83.95           | 22, 30, 8.6               | 31.14, 88.82         | 92.38, 84.44, 78.01       | 77.71                | 70.15, 83.00           |  |  |
| 10                      | 2        | 10          | 44.17, 1.03      | 49.92           | 91.9, 84.9, 78.0          | 73.37, 82.98           | 35, 47, 0.9               | 44.49, 89.12         | 90.65, 86.06, 78.01       | 77.47                | 72.27, 81.85           |  |  |
| 10                      | 2        | 100         | 58.48, 0.05      | 60.55           | 85.0, 91.8, 78.0          | 73.70, 79.55           | 47, 61, 0.1               | 56.50, 93.30         | 88.52, 88.12, 78.00       | 77.47                | 73.77, 80.53           |  |  |
| 10                      | 4        | 1           | 27.55, 9.13      | 34.16           | 93.6, 83.3, 78.0          | 70.65, 83.93           | 18, 32, 7.2               | 26.50, 77.57         | 92.78, 84.09, 78.02       | 77.40                | 69.78, 82.78           |  |  |
| 10                      | 4        | 10          | 41.91, 1.22      | 48.99           | 91.8, 85.0, 78.0          | 73.05, 83.21           | 30, 49, 0.7               | 38.43, 78.44         | 91.06, 85.66, 78.00       | 77.13                | 71.59, 81.50           |  |  |
| 10                      | 4        | 100         | 57.53, 0.05      | 59.65           | 84.5, 92.3, 78.0          | 73.62, 79.28           | 40, 61, 0.1               | 49.78, 83.44         | 89.10, 87.57, 78.03       | 77.42                | 72.92, 80.36           |  |  |
| 10                      | 8        | 1           | 26.22, 9.03      | 32.88           | 92.8, 84.1, 78.0          | 70.65, 83.88           | 14, 36, 4.7               | 20.37, 61.95         | 93.04, 83.85, 78.02       | 77.09                | 70.00, 82.68           |  |  |
| 10                      | 8        | 10          | 41.60, 0.93      | 47.03           | 90.3, 86.4, 78.0          | 73.12, 83.21           | 22, 49, 0.7               | 30.25, 64.31         | 91.43, 85.34, 78.03       | 77.00                | 71.13, 81.32           |  |  |
| 10                      | 8        | 100         | 56.07, 0.05      | 58.26           | 83.4, 93.6, 78.0          | 73.37, 78.69           | 30, 62, 0.1               | 40.20, 68.99         | 90.05, 86.64, 78.03       | 77.27                | 72.97, 80.50           |  |  |
