# Supplementary material for: Improved Minimum Cost and Maximum Power Two Stage Genome-Wide Association Study Designs
Source: PubMed Central journal article supplement (PMC3435377; doi:10.1371/journal.pone.0042367), 2012-09-06
Supplement: pone.0042367.s006.pdf [file pone.0042367.s006.pdf]

| Experimental Parameters |       |            | $\pi_0, \pi_1,$ | Stage 1,2,          | Sim. total | Tot. power   |
|-------------------------|-------|------------|-----------------|---------------------|------------|--------------|
| $R_{cc}$                | $c_2$ | % min cost | $\pi_M$ (%)     | tot. power (%)      | power (%)  | sensitivity  |
| 1                       | 1     | 90         | 25, 26, 8.9     | 89.97, 84.57, 76.08 | 76.41      | 69.46, 81.07 |
| 1                       | 1     | 75         | 20, 22, 7.3     | 81.91, 86.58, 70.91 | 71.03      | 65.79, 76.46 |
| 1                       | 1     | 50         | 12, 14, 5.6     | 58.75, 90.27, 53.03 | 53.98      | 50.08, 56.64 |
| 2                       | 1     | 90         | 19, 28, 8.0     | 89.28, 85.08, 75.95 | 75.54      | 68.33, 80.64 |
| 2                       | 1     | 75         | 15, 25, 6.4     | 81.51, 86.90, 70.83 | 70.05      | 63.68, 74.83 |
| 2                       | 1     | 50         | 8, 18, 4.9      | 58.57, 90.57, 53.04 | 53.11      | 49.10, 55.92 |
| 4                       | 1     | 90         | 18, 33, 6.3     | 91.54, 81.23, 74.36 | 73.52      | 68.14, 81.40 |
| 4                       | 1     | 75         | 13, 30, 6.3     | 86.55, 82.04, 71.00 | 70.39      | 64.96, 77.80 |
| 4                       | 1     | 50         | 7, 26, 4.1      | 67.94, 85.41, 58.02 | 57.52      | 54.06, 63.52 |
| 8                       | 1     | 90         | 14, 35, 5.4     | 93.11, 82.63, 76.93 | 75.85      | 68.00, 81.78 |
| 8                       | 1     | 75         | 11, 35, 4.3     | 89.91, 82.82, 74.46 | 73.57      | 65.80, 79.07 |
| 8                       | 1     | 50         | 6, 34, 2.7      | 77.08, 83.94, 64.70 | 64.00      | 57.57, 68.88 |
| 1                       | 10    | 90         | 38, 41, 0.9     | 86.45, 87.32, 75.49 | 75.88      | 70.98, 79.30 |
| 1                       | 10    | 75         | 30, 34, 0.8     | 75.58, 90.19, 68.16 | 68.55      | 64.24, 71.04 |
| 1                       | 10    | 50         | 18, 24, 0.5     | 46.76, 94.86, 44.35 | 44.85      | 42.98, 46.29 |
| 2                       | 10    | 90         | 30, 43, 0.9     | 86.39, 87.30, 75.42 | 75.21      | 70.00, 79.10 |
| 2                       | 10    | 75         | 23, 42, 0.6     | 77.17, 89.16, 68.80 | 68.81      | 64.41, 72.06 |
| 2                       | 10    | 50         | 13, 31, 0.4     | 48.49, 94.51, 45.83 | 45.90      | 43.73, 47.52 |
| 4                       | 10    | 90         | 29, 47, 0.7     | 88.25, 83.93, 74.06 | 73.37      | 69.59, 79.91 |
| 4                       | 10    | 75         | 22, 46, 0.6     | 82.97, 84.57, 70.16 | 69.62      | 66.32, 75.73 |
| 4                       | 10    | 50         | 11, 39, 0.5     | 61.50, 88.41, 54.37 | 54.18      | 52.08, 59.01 |
| 8                       | 10    | 90         | 23, 51, 0.6     | 91.53, 83.94, 76.82 | 75.68      | 69.82, 80.28 |
| 8                       | 10    | 75         | 18, 50, 0.5     | 87.84, 84.41, 74.13 | 73.05      | 67.61, 77.55 |
| 8                       | 10    | 50         | 10, 49, 0.3     | 74.34, 85.62, 63.65 | 63.24      | 58.22, 66.80 |
| 1                       | 100   | 90         | 49, 53, 0.1     | 82.41, 90.42, 74.51 | 74.64      | 71.40, 77.10 |
| 1                       | 100   | 75         | 37, 44, 0.1     | 68.43, 93.74, 64.14 | 64.94      | 61.75, 65.51 |
| 1                       | 100   | 50         | 19, 27, 0.1     | 33.60, 97.60, 32.79 | 32.86      | 32.22, 33.10 |
| 2                       | 100   | 90         | 40, 57, 0.1     | 83.50, 89.61, 74.82 | 74.89      | 71.12, 77.68 |
| 2                       | 100   | 75         | 28, 52, 0.1     | 71.88, 91.70, 65.91 | 65.78      | 62.05, 68.52 |
| 2                       | 100   | 50         | 13, 35, 0.1     | 36.74, 96.94, 35.61 | 36.02      | 34.83, 36.64 |
| 4                       | 100   | 90         | 37, 62, 0.1     | 87.17, 84.57, 73.72 | 72.88      | 71.03, 78.92 |
| 4                       | 100   | 75         | 27, 58, 0.1     | 79.79, 86.10, 68.70 | 68.54      | 66.53, 73.91 |
| 4                       | 100   | 50         | 11, 48, 0.1     | 50.45, 90.77, 45.79 | 45.97      | 45.16, 49.71 |
| 8                       | 100   | 90         | 30, 63, 0.1     | 90.07, 85.11, 76.66 | 75.67      | 71.00, 79.25 |
| 8                       | 100   | 75         | 22, 60, 0.1     | 85.29, 85.84, 73.21 | 72.49      | 68.14, 75.83 |
| 8                       | 100   | 50         | 9, 52, 0.1      | 62.88, 88.84, 55.85 | 55.31      | 51.86, 58.21 |
